# Supplementary material for: Synthesis of 2-aminopropyl benzopyran derivatives as potential agents against triple-negative breast cancer
Source: Royal Society of Chemistry journal article supplement (doi:10.1039/d3md00385j), 2023-01-01
Supplement: d3md00385j1.pdf [file d3md00385j1.pdf]

**Supplementary Information of**  
**Synthesis of 2-aminopropyl benzopyran derivatives as potential agents against**  
**triple negative breast cancer**

Ainhoa García<sup>a,b</sup>, Sandra Torres-Ruiz<sup>b</sup>, Laura Vila<sup>b</sup>, Carlos Villarroel-Vicente<sup>a,b</sup>,  
Álvaro Bernabeu<sup>a</sup>, Pilar Eroles<sup>b,c,d,\*</sup>, Nuria Cabedo<sup>a,b,\*</sup>, Diego Cortes<sup>a</sup>

NMR spectra of all final compounds.

|                                                                                                                                                                                                  |     |
|--------------------------------------------------------------------------------------------------------------------------------------------------------------------------------------------------|-----|
| 3-(6-( <i>p</i> -Fluorobenzyloxy)-2-methyldihydrobenzopyran-2-yl)- <i>N</i> -( <i>p</i> -methoxyphenethyl)propanamine ( <b>5</b> ).                                                              | S2  |
| <i>N</i> -(2,2-Diphenylethyl)-3-(6-( <i>p</i> -fluorobenzyloxy)-2-methyldihydrobenzopyran-2-yl)propanamine ( <b>6</b> ).                                                                         | S3  |
| 1-(2-(6-(( <i>p</i> -Fluorobenzyl)oxy)-2-methyldihydrobenzopyran-2-yl)ethyl)-6,7-dimethoxy-1,2,3,4-tetrahydroisoquinoline ( <b>7</b> ).                                                          | S4  |
| 3-(6-Hydroxy-2-methyldihydrobenzopyran-2-yl)- <i>N</i> -( <i>p</i> -methoxyphenethyl)propanamine ( <b>5a</b> ).                                                                                  | S5  |
| 2-(3-((2,2-Diphenylethyl)amino)propyl)-2-methyldihydrobenzopyran-6-ol ( <b>6a</b> ).                                                                                                             | S6  |
| 2-(2-(6,7-Dimethoxy-1,2,3,4-tetrahydroisoquinolin-1-yl)ethyl)-2-methyldihydrobenzopyran-6-ol ( <b>7a</b> ).                                                                                      | S7  |
| 3-(6-( <i>p</i> -Fluorobenzyloxy)-2-methyldihydrobenzopyran-2-yl)- <i>N</i> -( <i>p</i> -methoxyphenethyl)- <i>N</i> -methyl-propanamine ( <b>5b</b> ).                                          | S8  |
| <i>N</i> -(2,2-Diphenylethyl)-3-(6-(( <i>p</i> -fluorobenzyl)oxy)-2-methyldihydrobenzopyran-2-yl)- <i>N</i> -methylpropan-1-amine ( <b>6b</b> ).                                                 | S9  |
| 1-(2-(6-(( <i>p</i> -Fluorobenzyl)oxy)-2-methyldihydrobenzopyran-2-yl)ethyl)-6,7-dimethoxy-2-methyl-1,2,3,4-tetrahydroisoquinoline ( <b>7b</b> ).                                                | S10 |
| 3-(6-( <i>p</i> -Fluorobenzyloxy)-2-methyldihydrobenzopyran-2-yl)- <i>N</i> -( <i>p</i> -methoxyphenethyl)- <i>N,N</i> -dimethylpropan-1-aminium ( <b>5c</b> ).                                  | S11 |
| <i>N</i> -(2,2-Diphenylethyl)-3-(6-(( <i>p</i> -fluorobenzyl)oxy)-2-methyldihydrobenzopyran-2-yl)- <i>N,N</i> -dimethylpropan-1-aminium ( <b>6c</b> ).                                           | S12 |
| 1-(2-(6-(( <i>p</i> -Fluorobenzyl)oxy)-2-methyldihydrobenzopyran-2-yl)ethyl)-6,7-dimethoxy-2,2-dimethyl-1,2,3,4-tetrahydroisoquinolin-2-ium ( <b>7c</b> ).                                       | S13 |
| 3-( <i>p</i> -Chlorophenyl)- <i>N</i> -(3-(6-(( <i>p</i> -fluorobenzyl)oxy)-2-methyldihydrobenzopyran-2-yl)propyl)- <i>N</i> -( <i>p</i> -methoxyphenethyl)urea ( <b>5d</b> ).                   | S14 |
| 3-( <i>p</i> -Chlorophenyl)- <i>N</i> -(2,2-diphenylethyl)- <i>N</i> -(3-(6-(( <i>p</i> -fluorobenzyl)oxy)-2-methyldihydrobenzopyran-2-yl)propyl)urea ( <b>6d</b> ).                             | S15 |
| <i>N</i> -( <i>p</i> -Chlorophenyl)-1-(2-(6-(( <i>p</i> -fluorobenzyl)oxy)-2-methyldihydrobenzopyran-2-yl)ethyl)-6,7-dimethoxy-3,4-dihydroisoquinoline-2(1 <i>H</i> )-carboxamide ( <b>7d</b> ). | S16 |

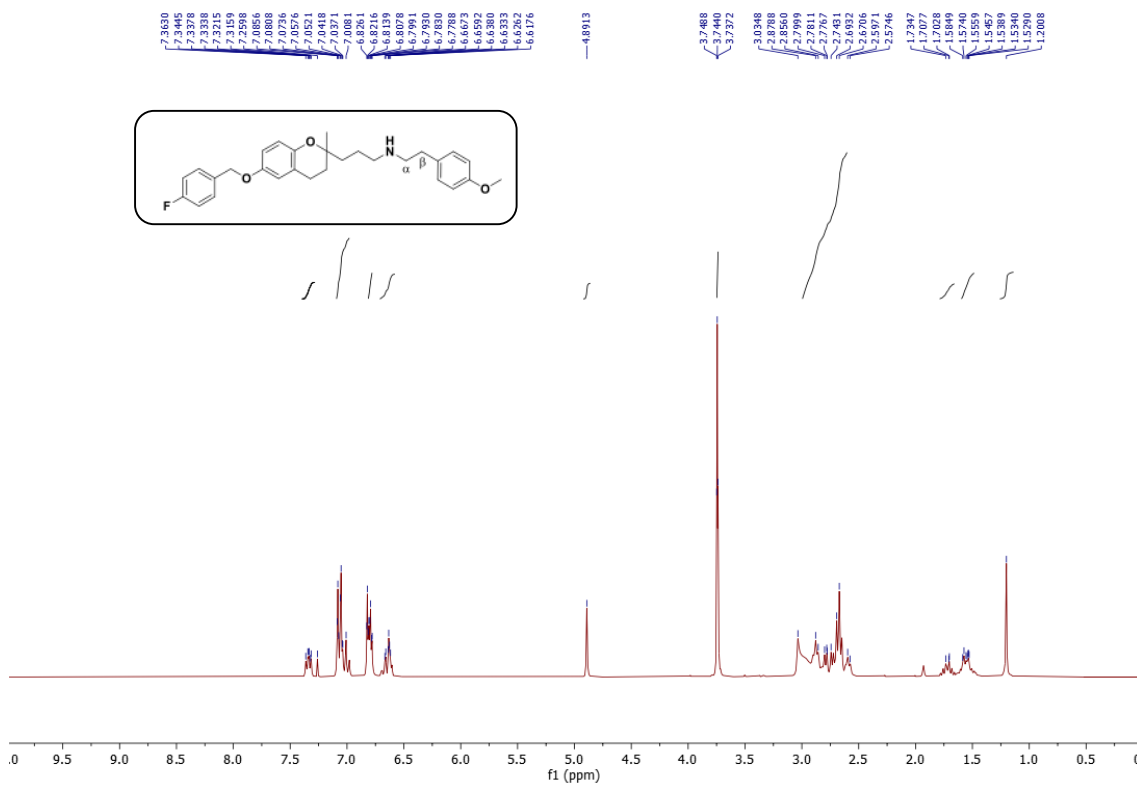

<sup>1</sup>H NMR (300 MHz, CDCl<sub>3</sub>) of 3-(6-(p-Fluorobenzyloxy)-2-methyldihydrobenzopyran-2-yl)-N-(p-methoxyphenethyl)propanamine (5).

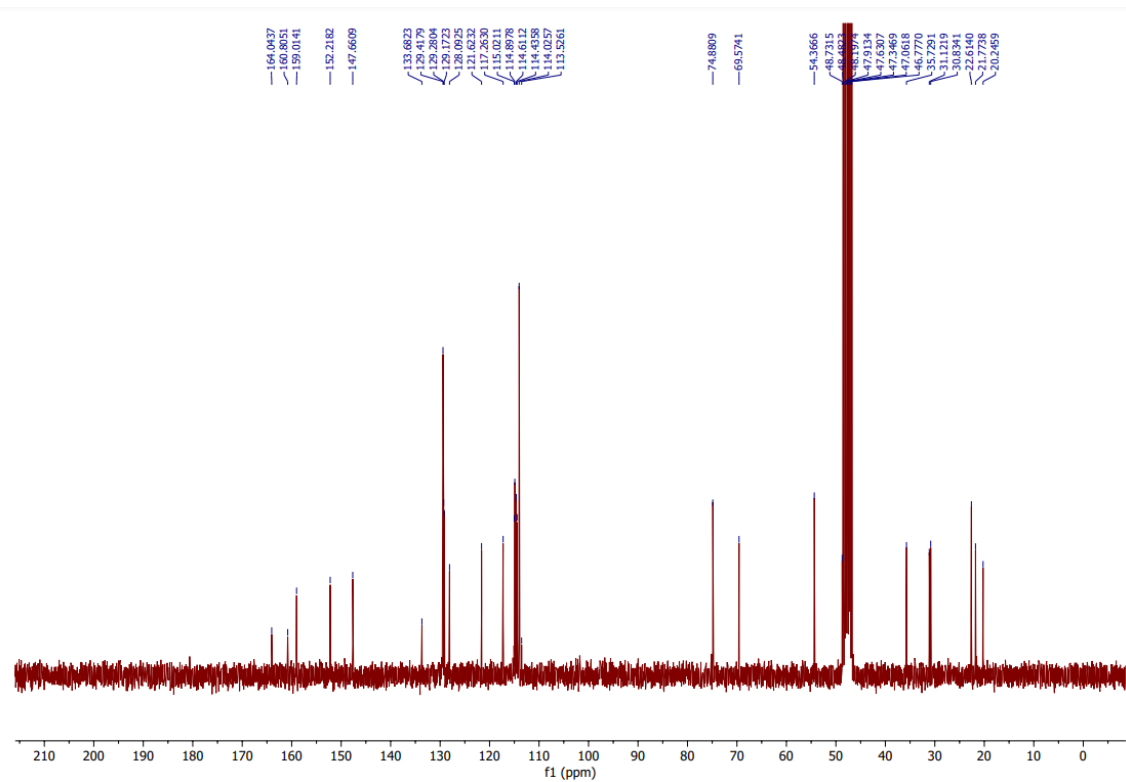

<sup>13</sup>C NMR (75 MHz, CD<sub>3</sub>OD) of 3-(6-(p-Fluorobenzyloxy)-2-methyldihydrobenzopyran-2-yl)-N-(p-methoxyphenethyl)propanamine (5).

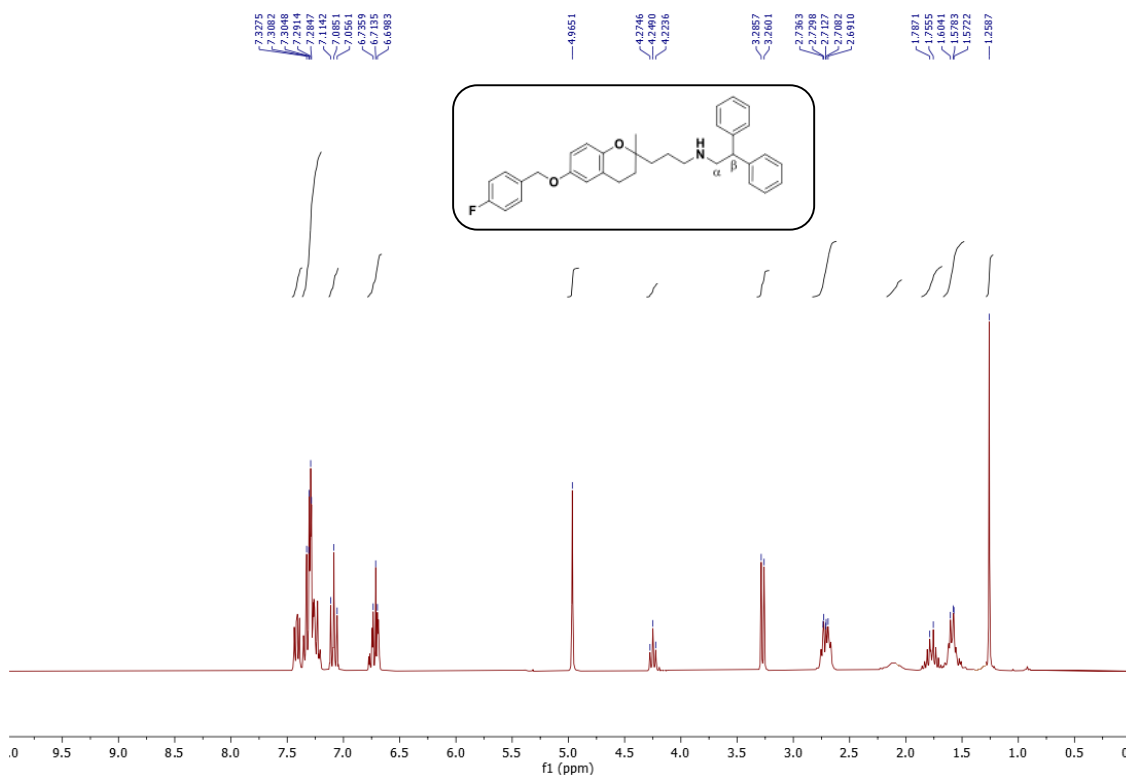

<sup>1</sup>H NMR (300 MHz, CDCl<sub>3</sub>) of *N*-(2,2-Diphenylethyl)-3-(6-(*p*-fluorobenzyloxy)-2-methyl-dihydrobenzopyran-2-yl)propanamine (**6**).

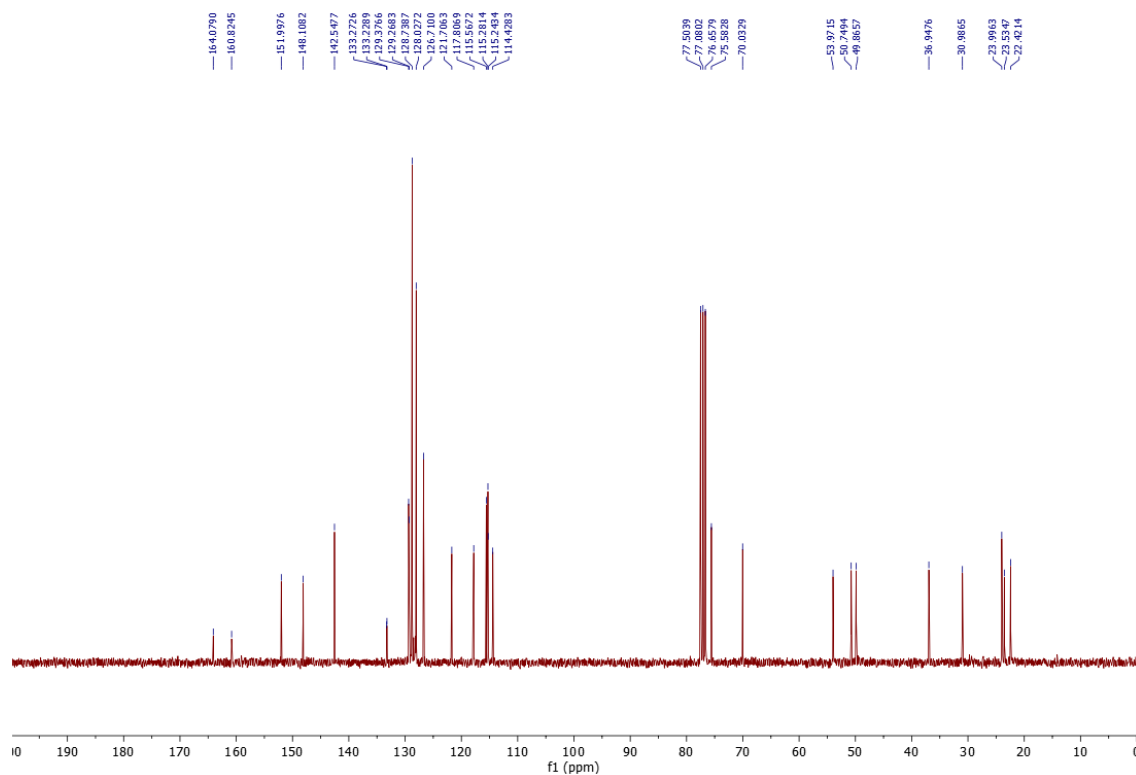

<sup>13</sup>C NMR (75 MHz, CDCl<sub>3</sub>) of *N*-(2,2-Diphenylethyl)-3-(6-(*p*-fluorobenzyloxy)-2-methyl-dihydrobenzopyran-2-yl)propanamine (**6**).

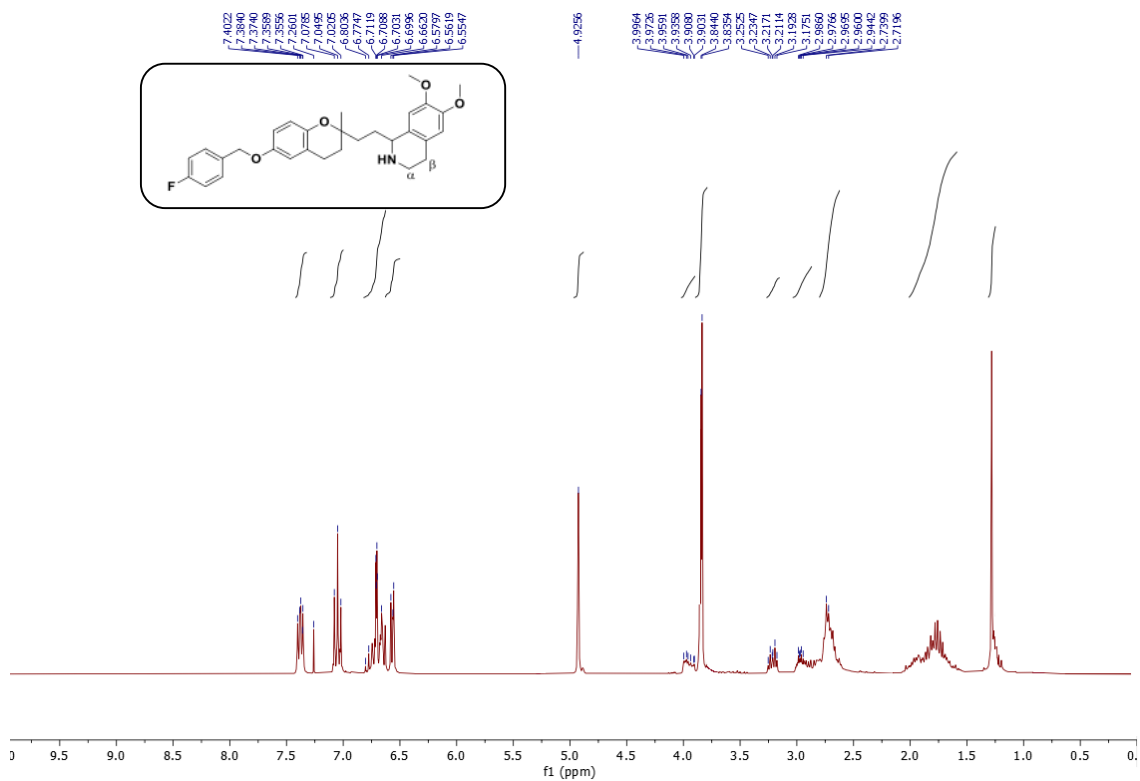

<sup>1</sup>H NMR (300 MHz, CDCl<sub>3</sub>) of 1-(2-(6-((p-Fluorobenzyl)oxy)-2-methyldihydro benzopyran-2-yl)ethyl)-6,7-dimethoxy-1,2,3,4-tetrahydroisoquinoline (7).

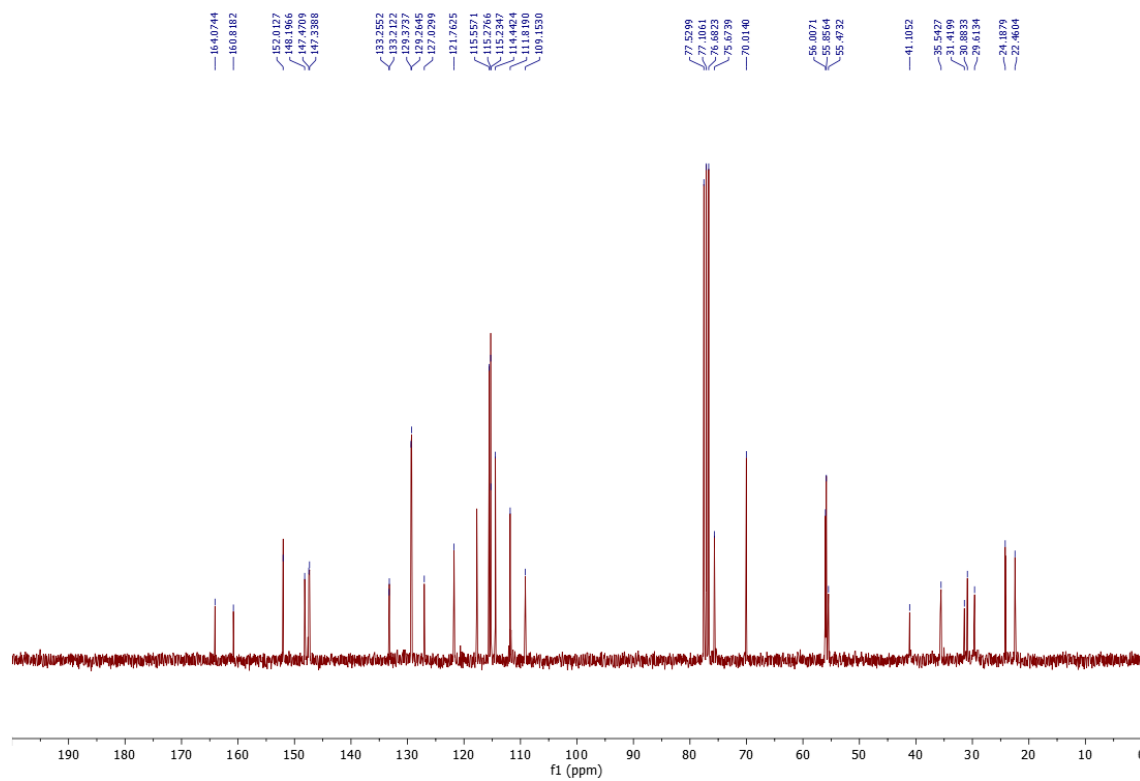

<sup>13</sup>C NMR (75 MHz, CDCl<sub>3</sub>) of 1-(2-(6-((p-Fluorobenzyl)oxy)-2-methyldihydro benzopyran-2-yl)ethyl)-6,7-dimethoxy-1,2,3,4-tetrahydroisoquinoline (7).

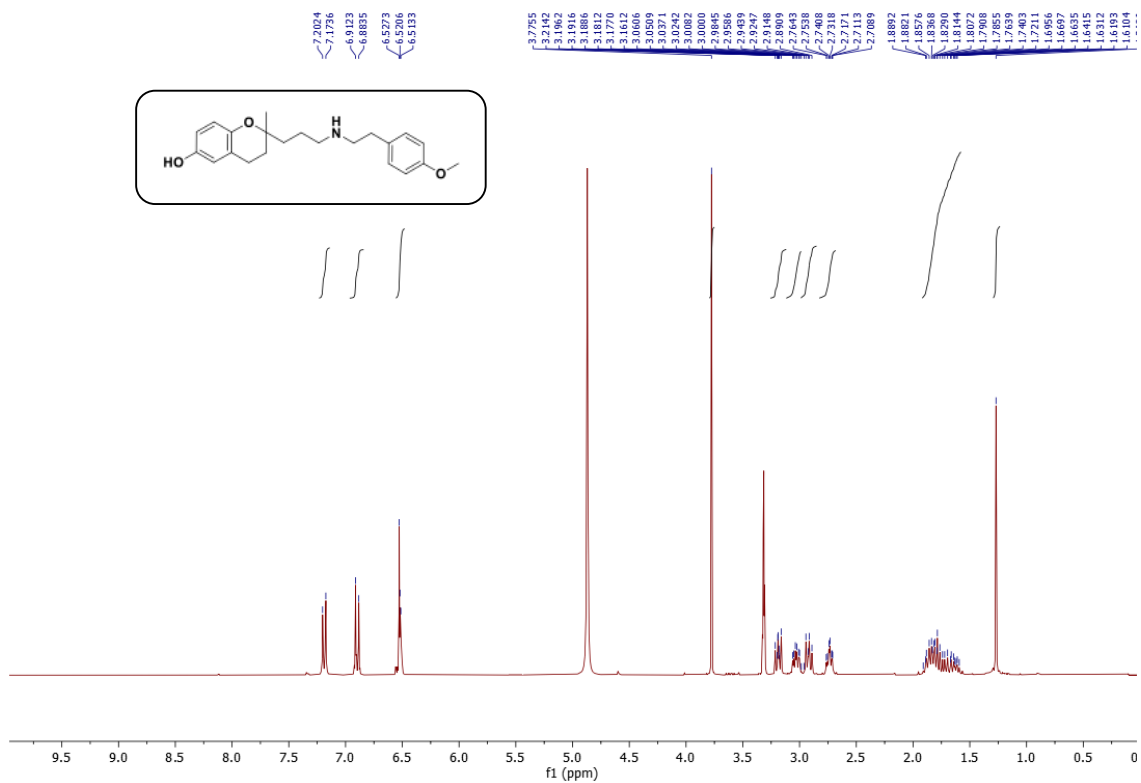

<sup>1</sup>H NMR (300 MHz, CD<sub>3</sub>OD) of 3-(6-Hydroxy-2-methylidihydrobenzopyran-2-yl)-N-(p-methoxyphenethyl)propanamine (**5a**).

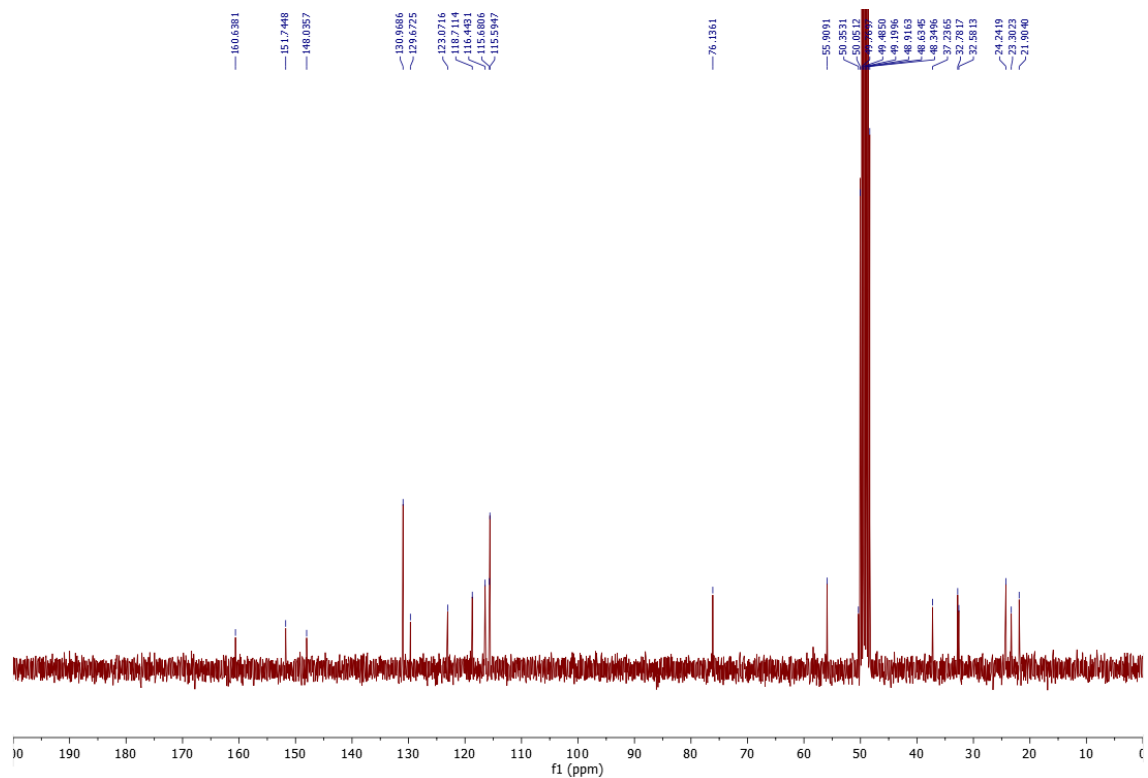

<sup>13</sup>C NMR (75 MHz, CD<sub>3</sub>OD) of 3-(6-Hydroxy-2-methylidihydrobenzopyran-2-yl)-N-(p-methoxyphenethyl)propanamine (**5a**).

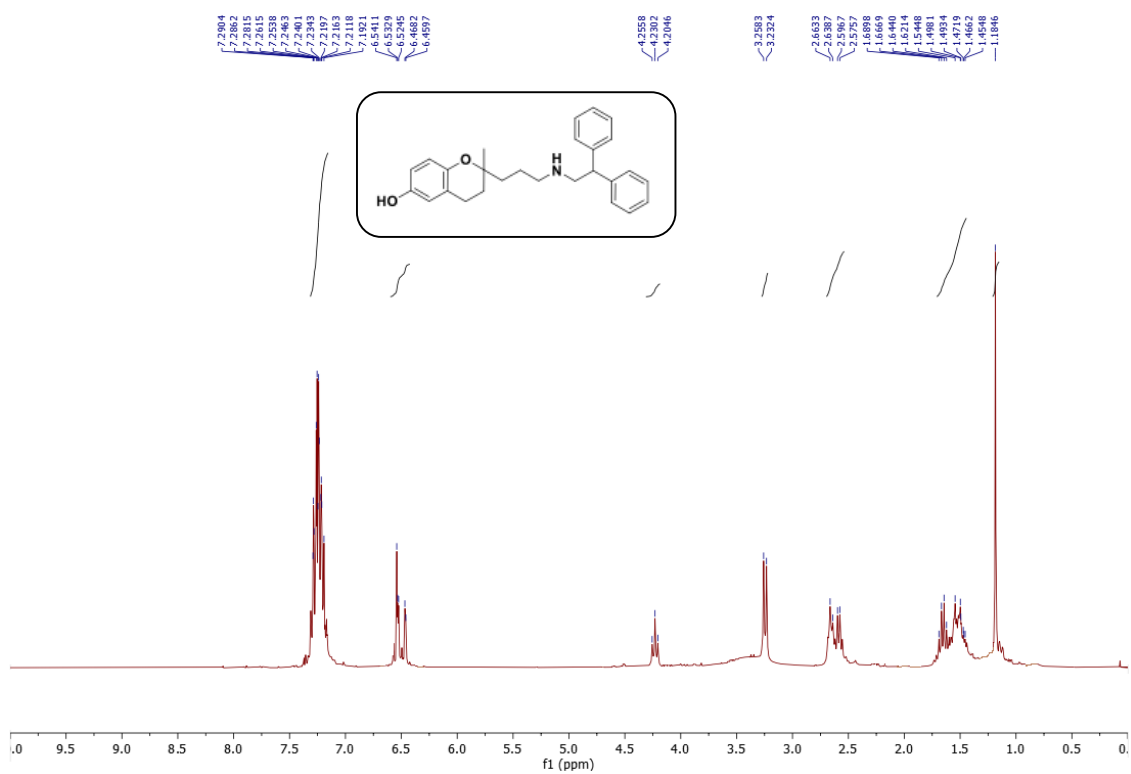

<sup>1</sup>H NMR (300 MHz, CDCl<sub>3</sub>) of 2-(3-((2,2-Diphenylethyl)amino)propyl)-2-methyl dihydrobenzopyran-6-ol (**6a**).

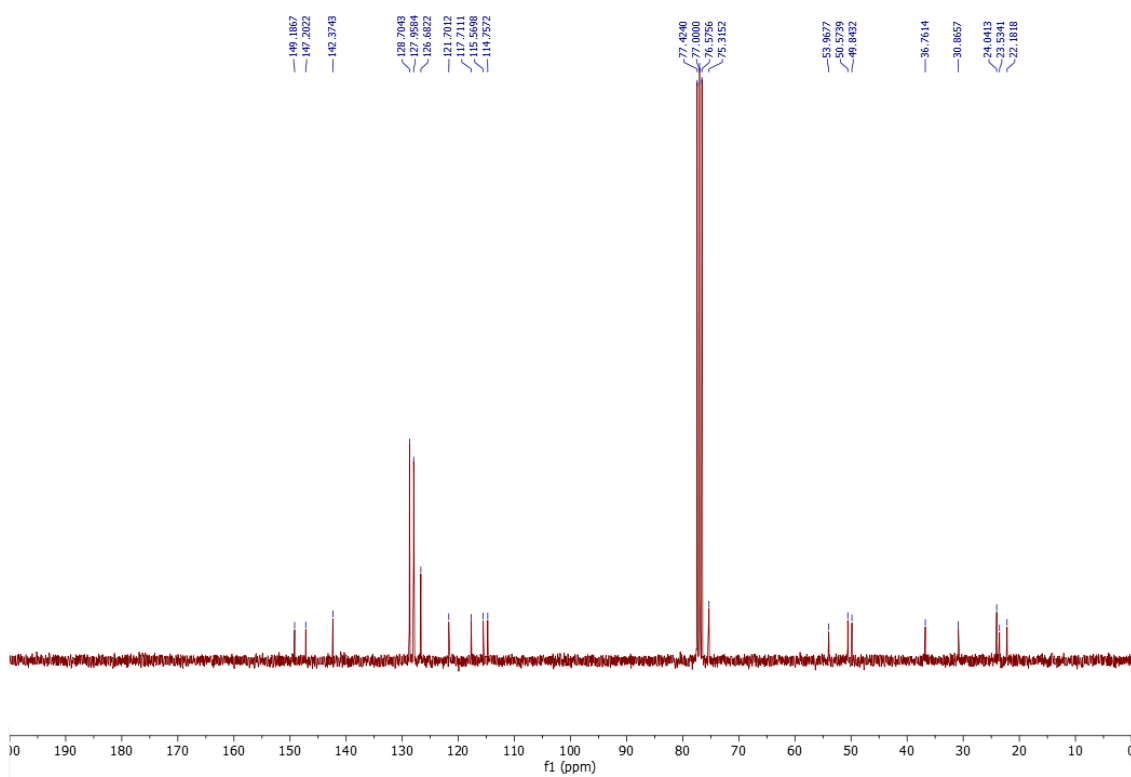

<sup>13</sup>C NMR (75 MHz, CDCl<sub>3</sub>) of 2-(3-((2,2-Diphenylethyl)amino)propyl)-2-methyl dihydrobenzopyran-6-ol (**6a**).

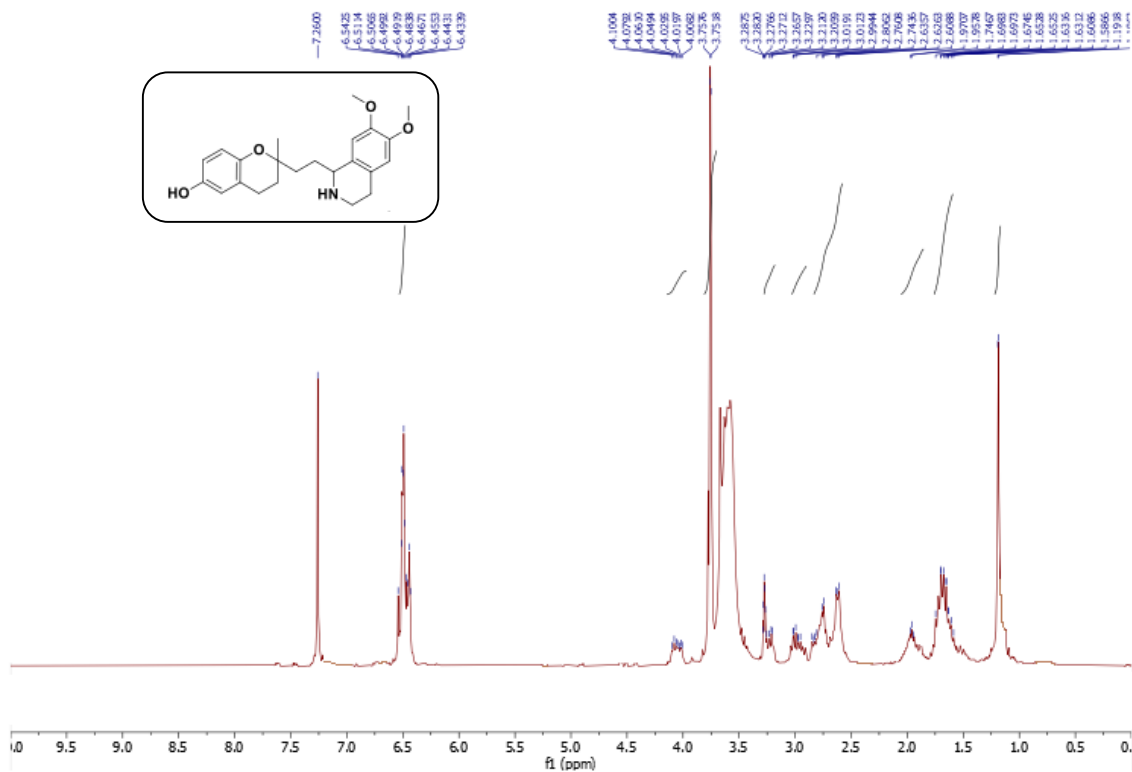

$^1\text{H}$  NMR (300 MHz,  $\text{CDCl}_3$  + 1 drop  $\text{CD}_3\text{OD}$ ) of 2-(2-(6,7-Dimethoxy-1,2,3,4-tetrahydroisoquinolin-1-yl)ethyl)-2-methyldihydrobenzopyran-6-ol (**7a**).

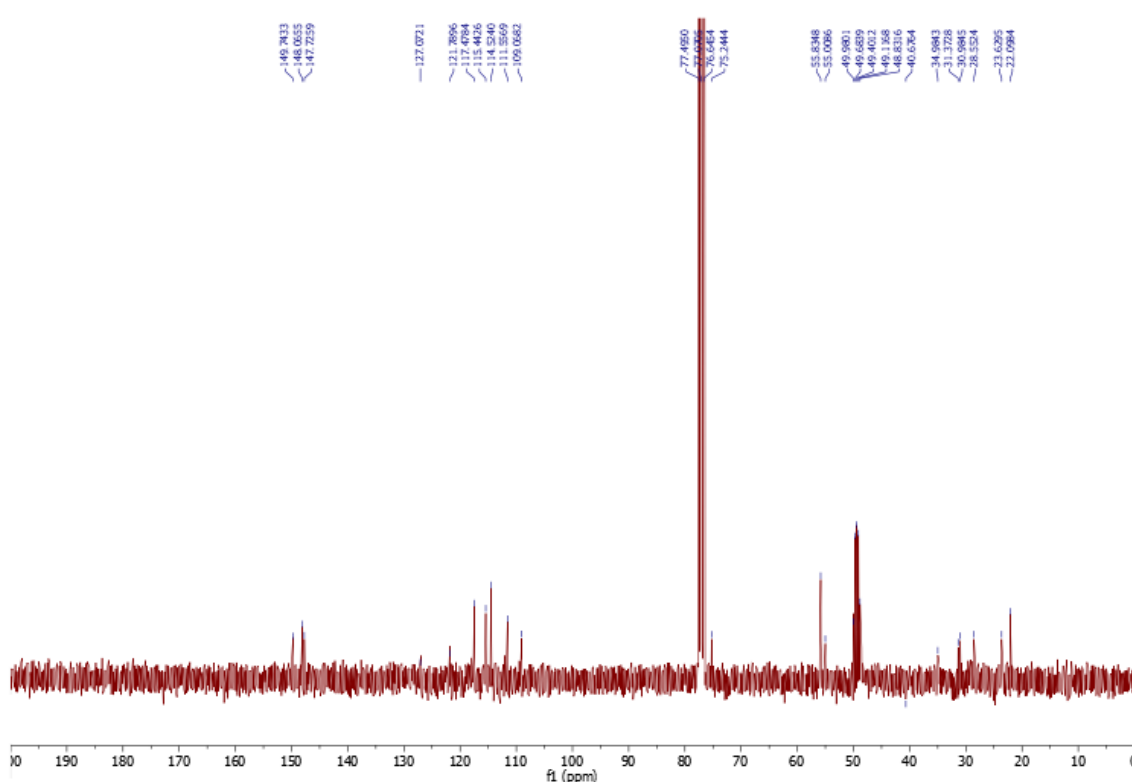

$^{13}\text{C}$  NMR (75 MHz,  $\text{CDCl}_3$  + 1 drop  $\text{CD}_3\text{OD}$ ) of 2-(2-(6,7-Dimethoxy-1,2,3,4-tetrahydroisoquinolin-1-yl)ethyl)-2-methyldihydrobenzopyran-6-ol (**7a**).

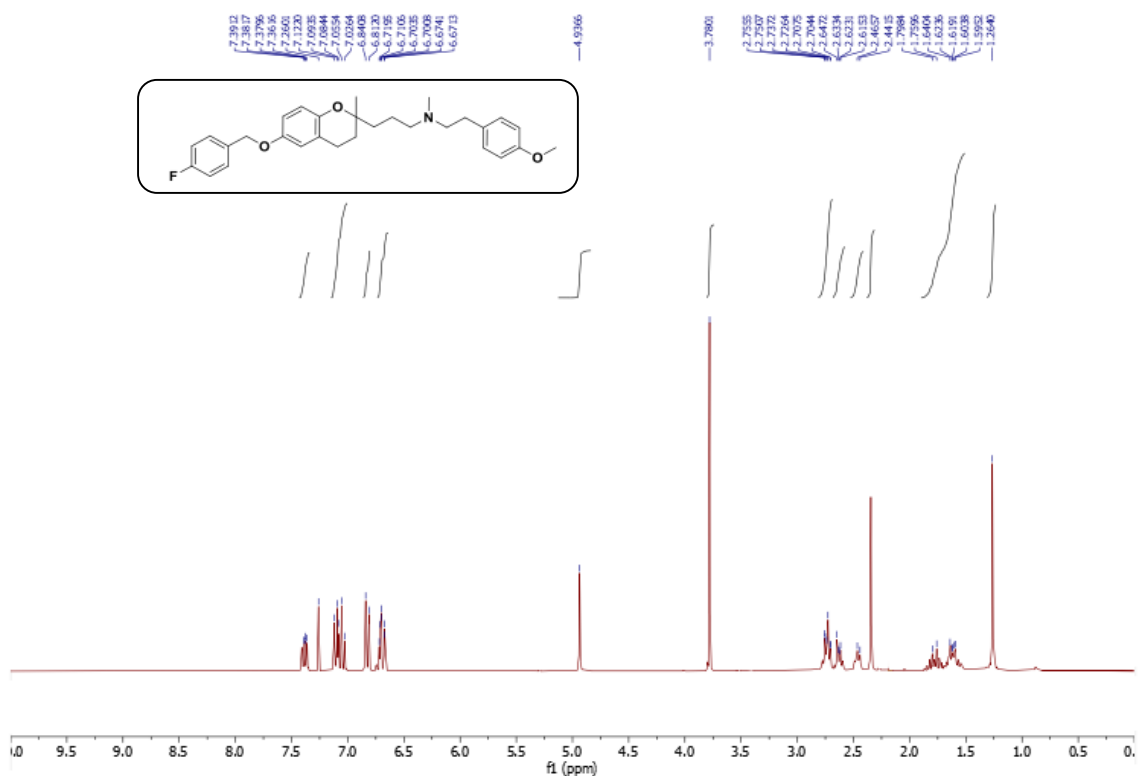

<sup>1</sup>H NMR (300 MHz, CDCl<sub>3</sub>) of 3-(6-(*p*-Fluorobenzoyloxy)-2-methyl-dihydrobenzopyran-2-yl)-*N*-(*p*-methoxyphenethyl)-*N*-methyl-propanamine (**5b**).

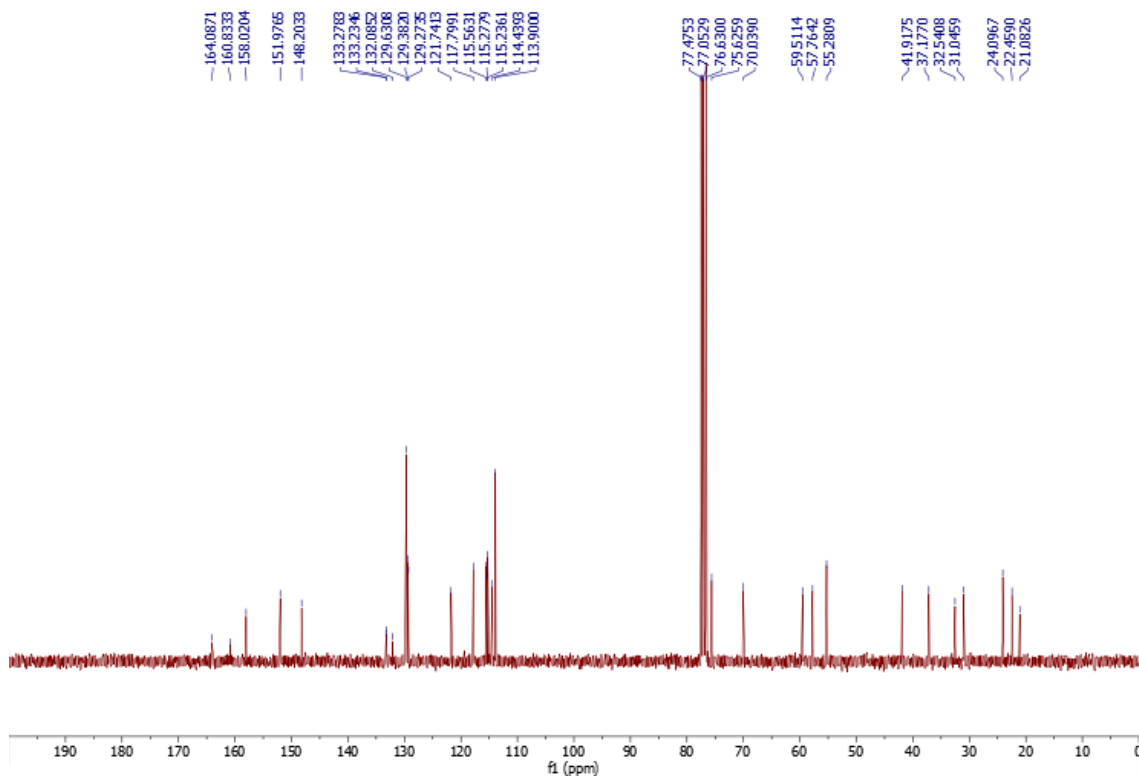

<sup>13</sup>C NMR (75 MHz, CDCl<sub>3</sub>) of 3-(6-(*p*-Fluorobenzoyloxy)-2-methyl-dihydrobenzopyran-2-yl)-*N*-(*p*-methoxyphenethyl)-*N*-methyl-propanamine (**5b**).



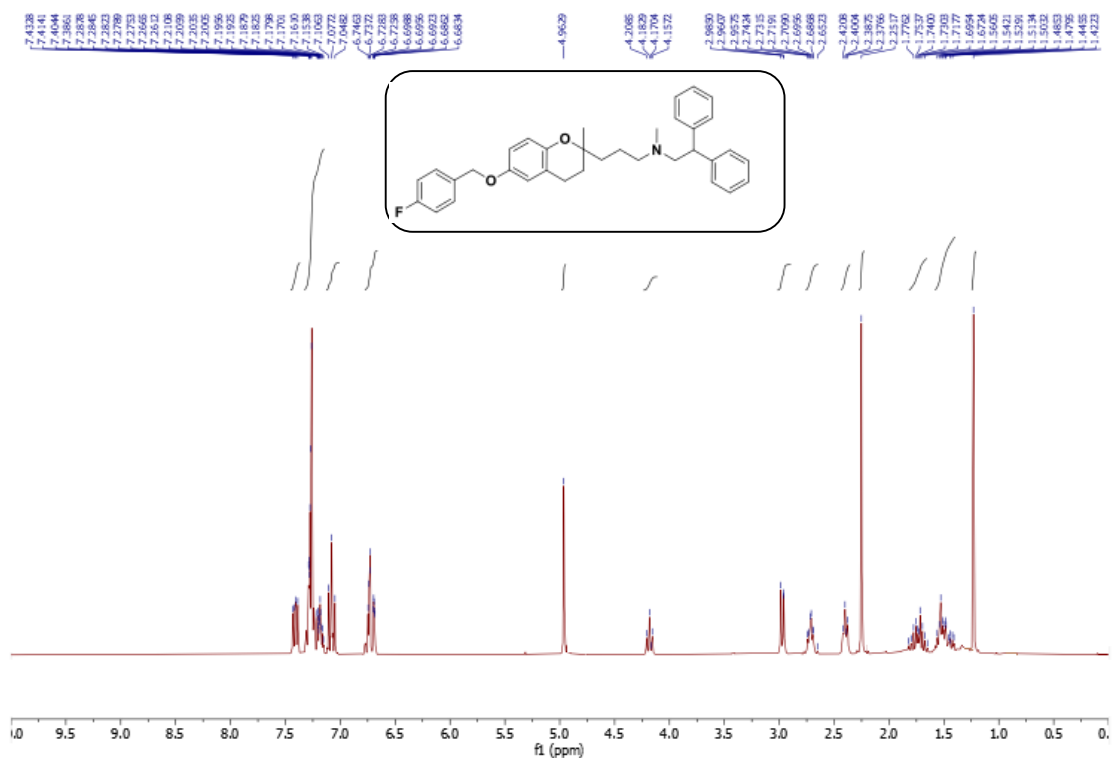

<sup>1</sup>H NMR (300 MHz, CDCl<sub>3</sub>) of *N*-(2,2-Diphenylethyl)-3-(6-((*p*-fluorobenzyl)oxy)-2-methyl-dihydrobenzopyran-2-yl)-*N*-methylpropan-1-amine (**6b**).

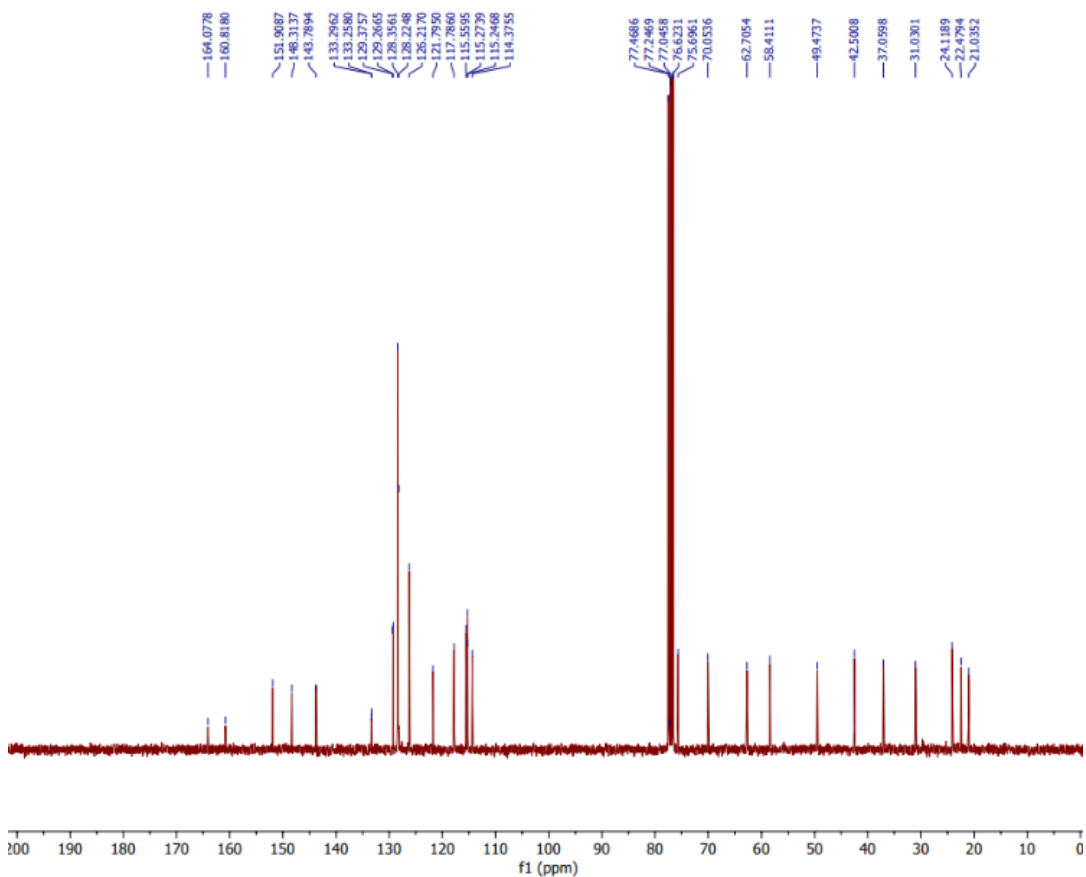

<sup>13</sup>C NMR (75 MHz, CDCl<sub>3</sub>) of *N*-(2,2-Diphenylethyl)-3-(6-((*p*-fluorobenzyl)oxy)-2-methyl-dihydrobenzopyran-2-yl)-*N*-methylpropan-1-amine (**6b**).

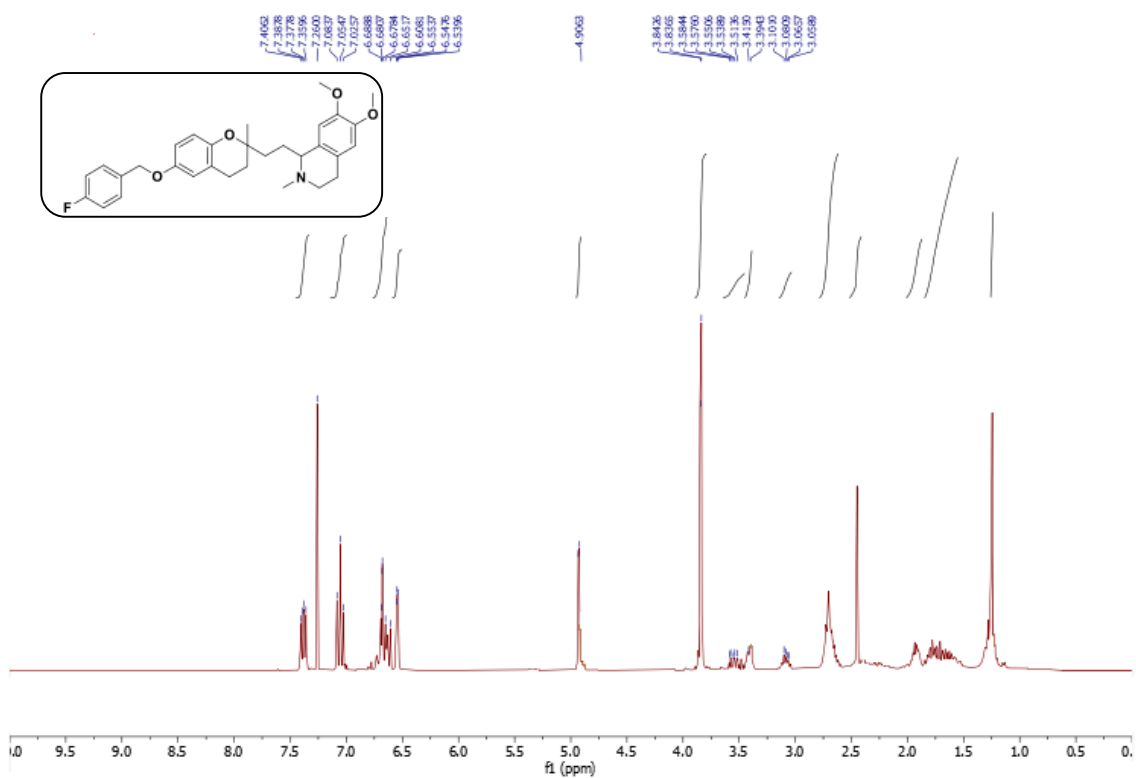

<sup>1</sup>H NMR (300 MHz, CDCl<sub>3</sub>) of 1-(2-(6-(*p*-Fluorobenzyl)oxy)-2-methyldihydrobenzopyran-2-yl)ethyl-6,7-dimethoxy-2-methyl-1,2,3,4-THIQ (**7b**).

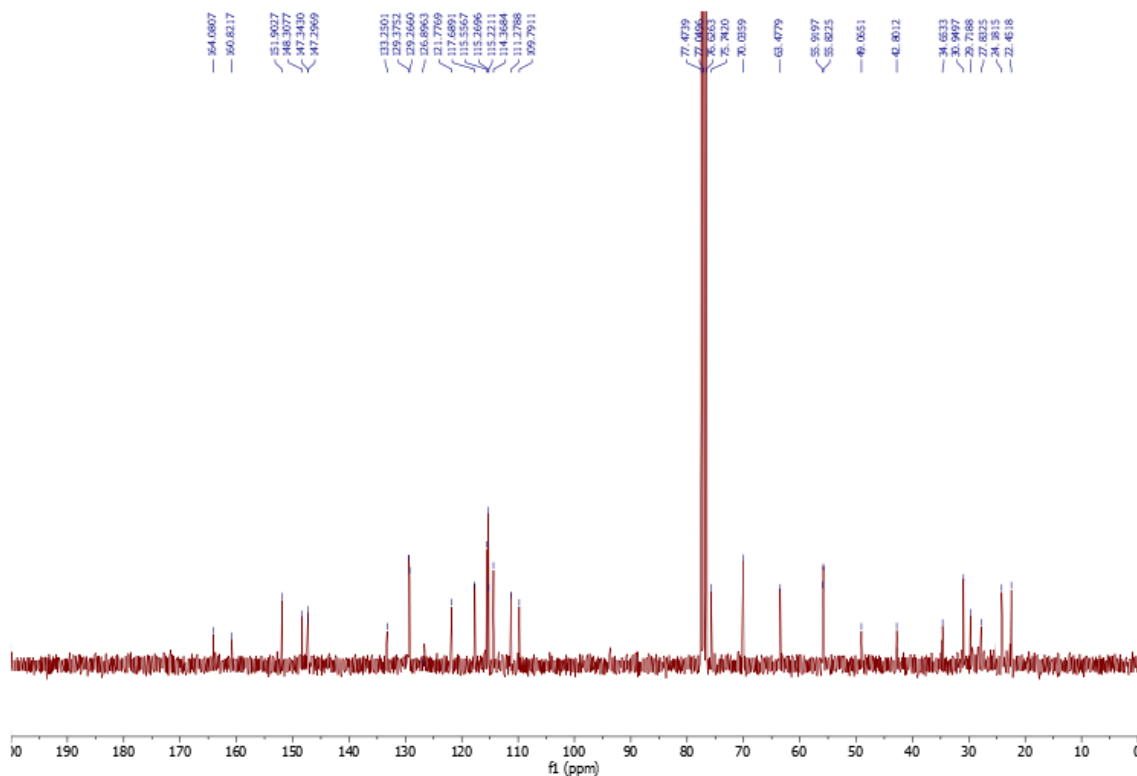

<sup>13</sup>C NMR (75 MHz, CDCl<sub>3</sub>) of 1-(2-(6-(*p*-Fluorobenzyl)oxy)-2-methyldihydrobenzopyran-2-yl)ethyl-6,7-dimethoxy-2-methyl-1,2,3,4-THIQ (**7b**).

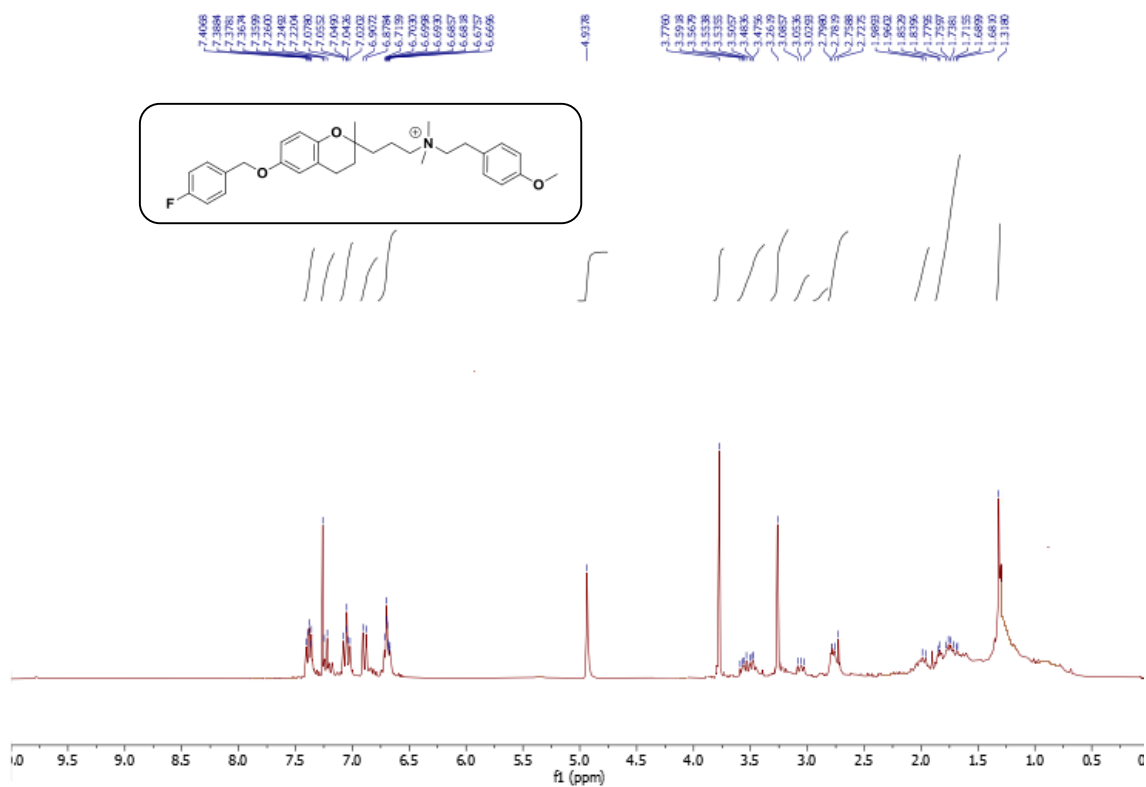

<sup>1</sup>H NMR (300 MHz, CDCl<sub>3</sub>) of 3-(6-(*p*-Fluorobenzoyloxy)-2-methyldihydrobenzopyran-2-yl)-*N*-(*p*-methoxyphenethyl)-*N,N*-dimethylpropan-1-aminium (**5c**).

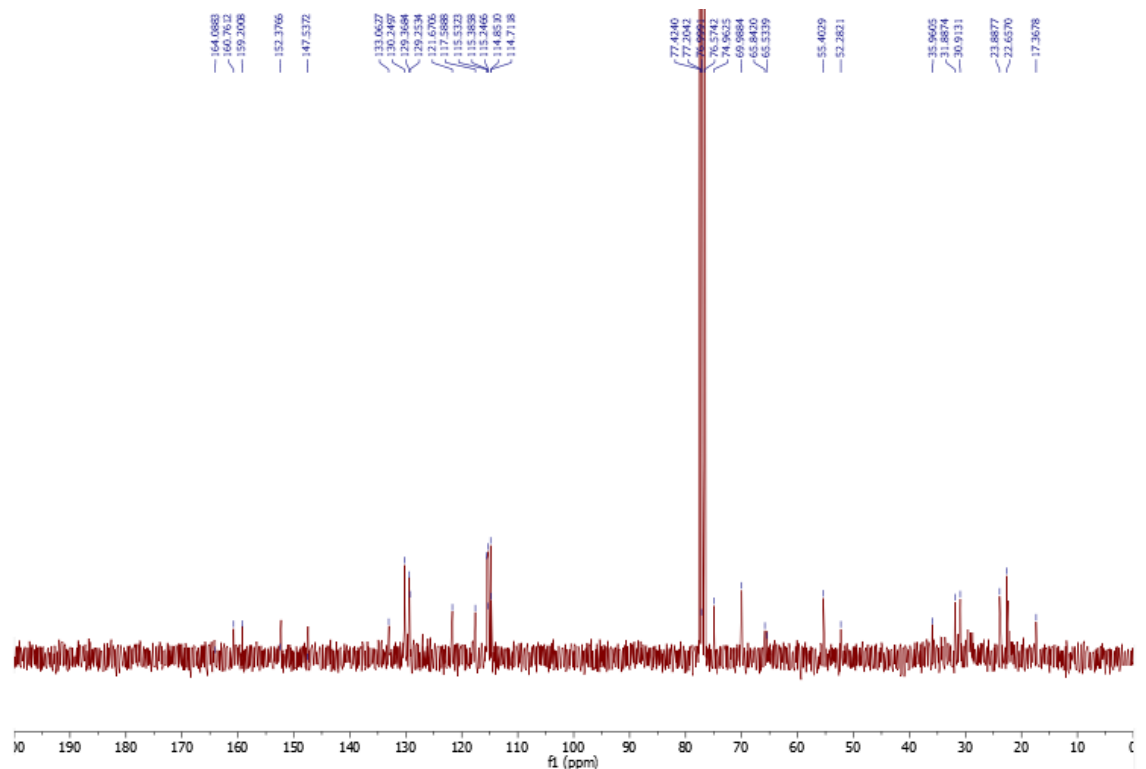

<sup>13</sup>C NMR (75 MHz, CDCl<sub>3</sub>) of 3-(6-(*p*-Fluorobenzoyloxy)-2-methyldihydrobenzopyran-2-yl)-*N*-(*p*-methoxyphenethyl)-*N,N*-dimethylpropan-1-aminium (**5c**).

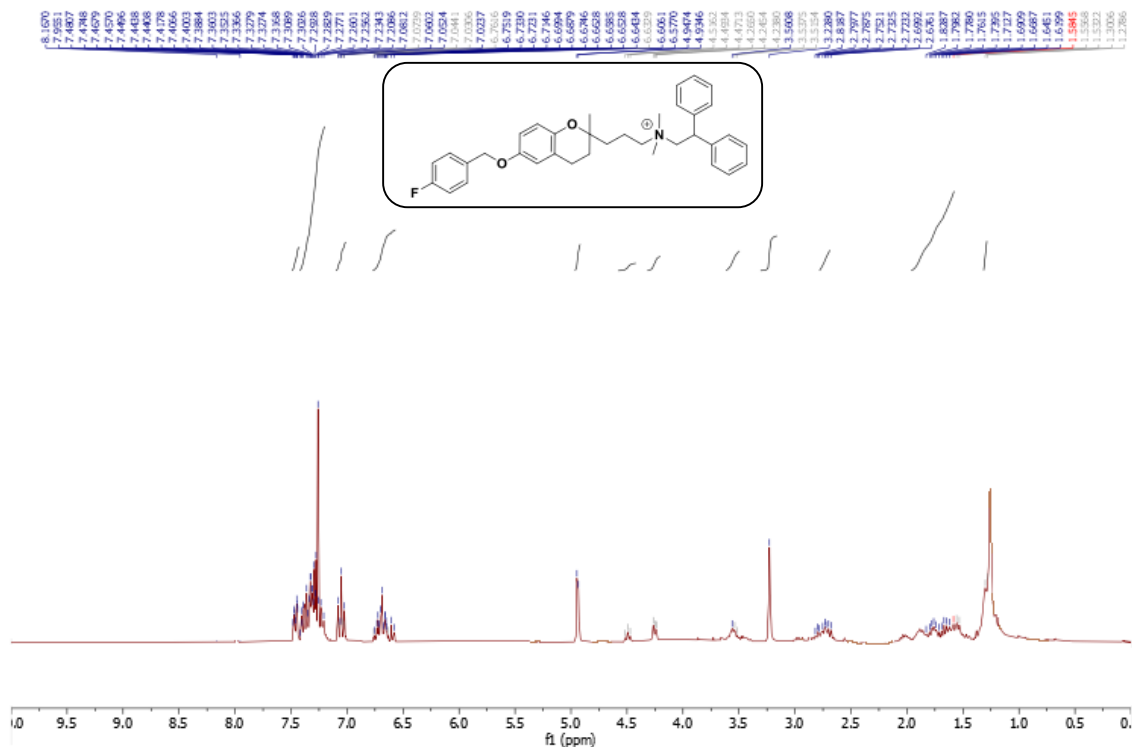

<sup>1</sup>H NMR (300 MHz, CDCl<sub>3</sub>) of *N*-(2,2-Diphenylethyl)-3-(6-((*p*-fluorobenzyl)oxy)-2-methyldihydrobenzopyran-2-yl)-*N,N*-dimethylpropan-1-aminium (**6c**).

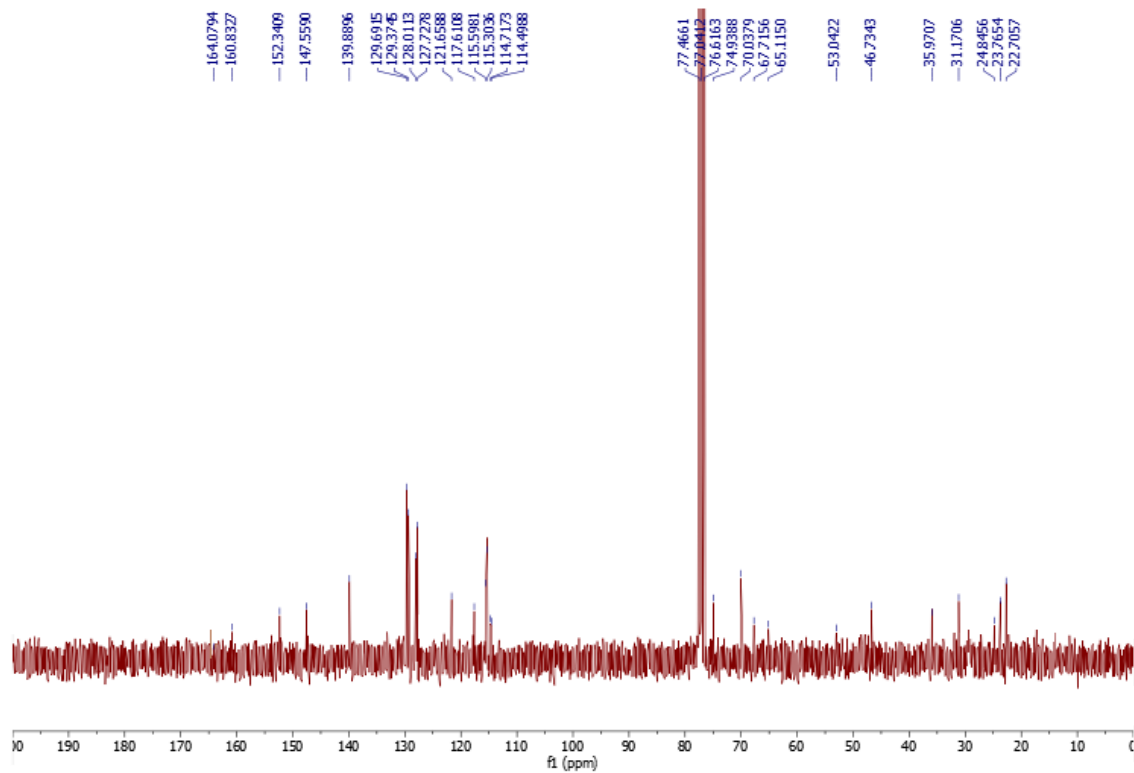

<sup>13</sup>C NMR (75 MHz, CDCl<sub>3</sub>) of *N*-(2,2-Diphenylethyl)-3-(6-((*p*-fluorobenzyl)oxy)-2-methyldihydrobenzopyran-2-yl)-*N,N*-dimethylpropan-1-aminium (**6c**).

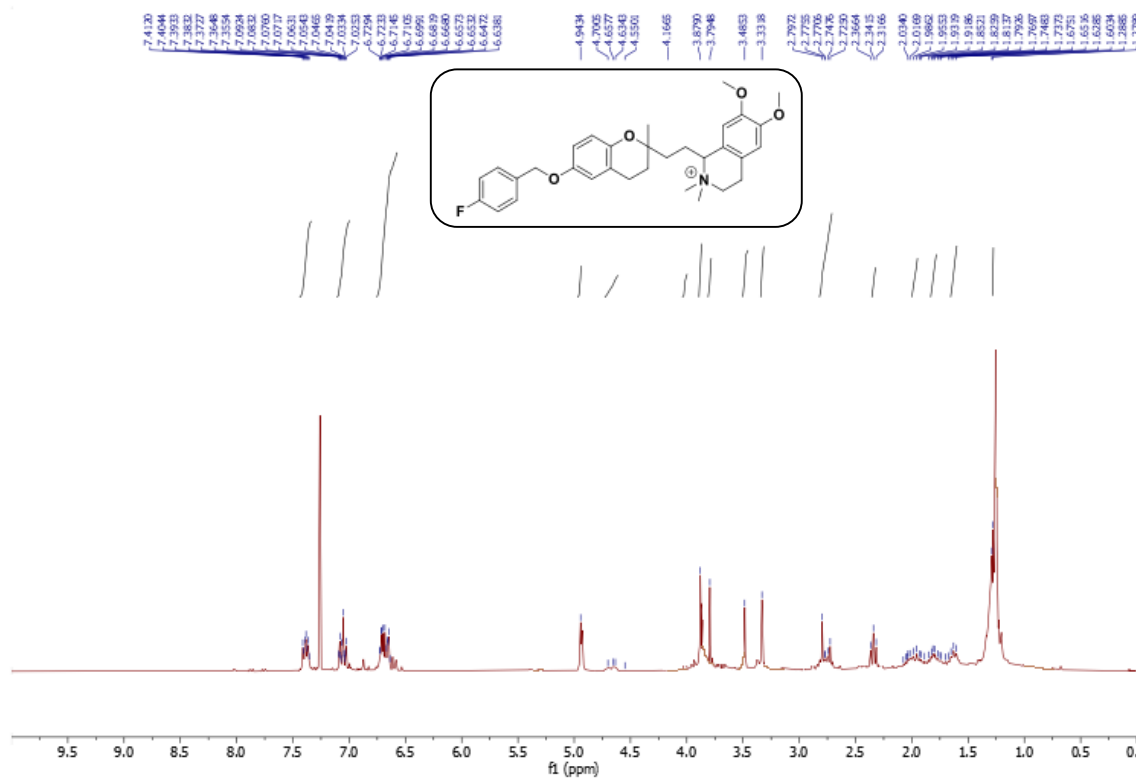

<sup>1</sup>H NMR (300 MHz, CDCl<sub>3</sub>) of 1-(2-(6-((*p*-Fluorobenzyl)oxy)-2-methyldihydrobenzopyran-2-yl)ethyl)-6,7-dimethoxy-2,2-dimethyl-1,2,3,4-tetrahydroisoquinolin-2-ium (7c).

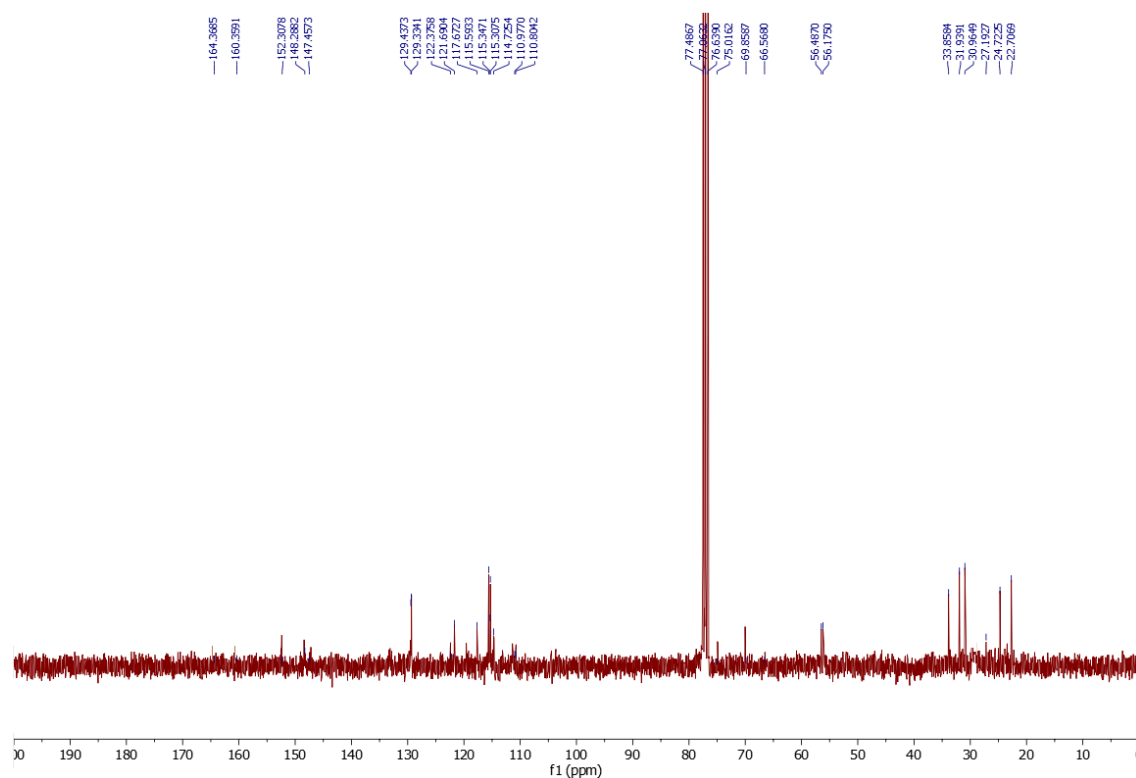

<sup>13</sup>C NMR (75 MHz, CDCl<sub>3</sub>) of 1-(2-(6-((*p*-Fluorobenzyl)oxy)-2-methyldihydrobenzopyran-2-yl)ethyl)-6,7-dimethoxy-2,2-dimethyl-1,2,3,4-tetrahydroisoquinolin-2-ium (7c).

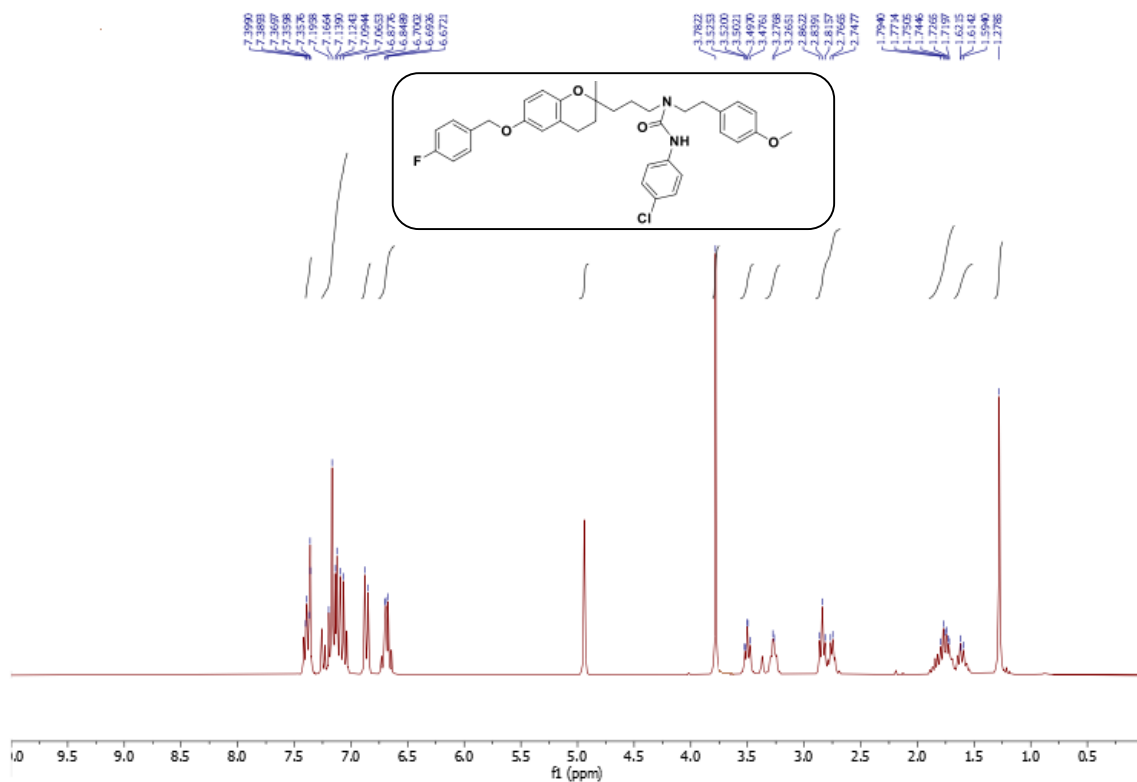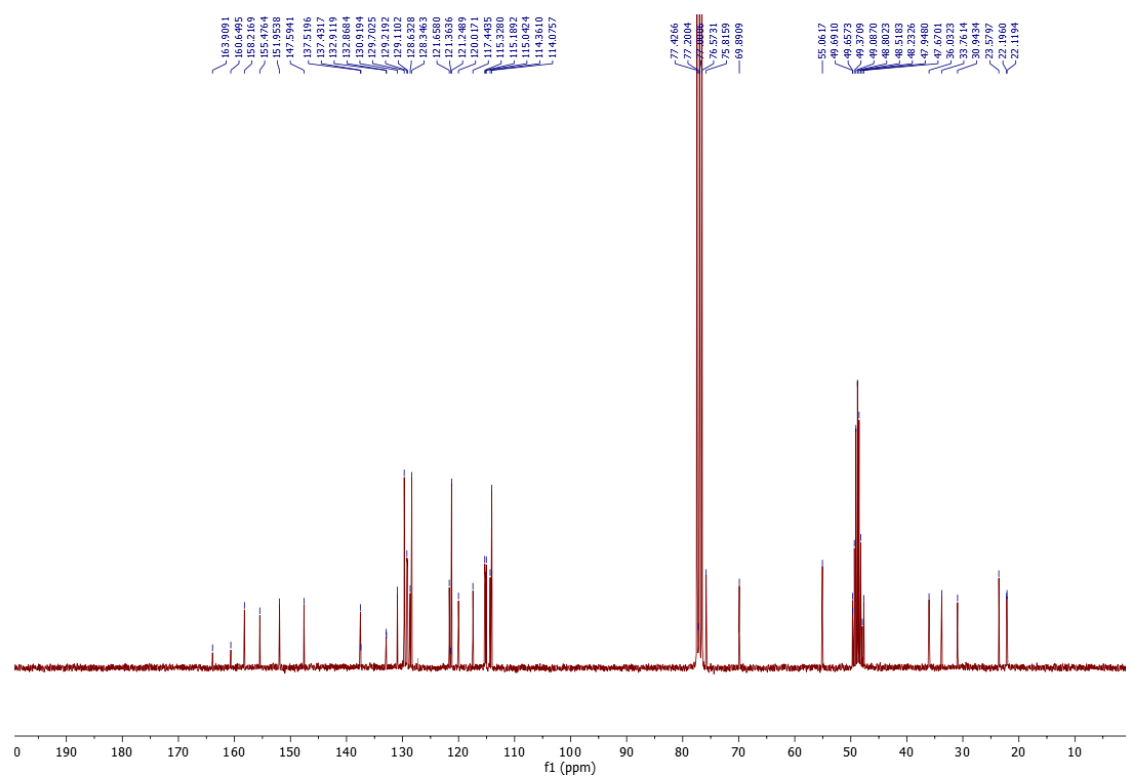

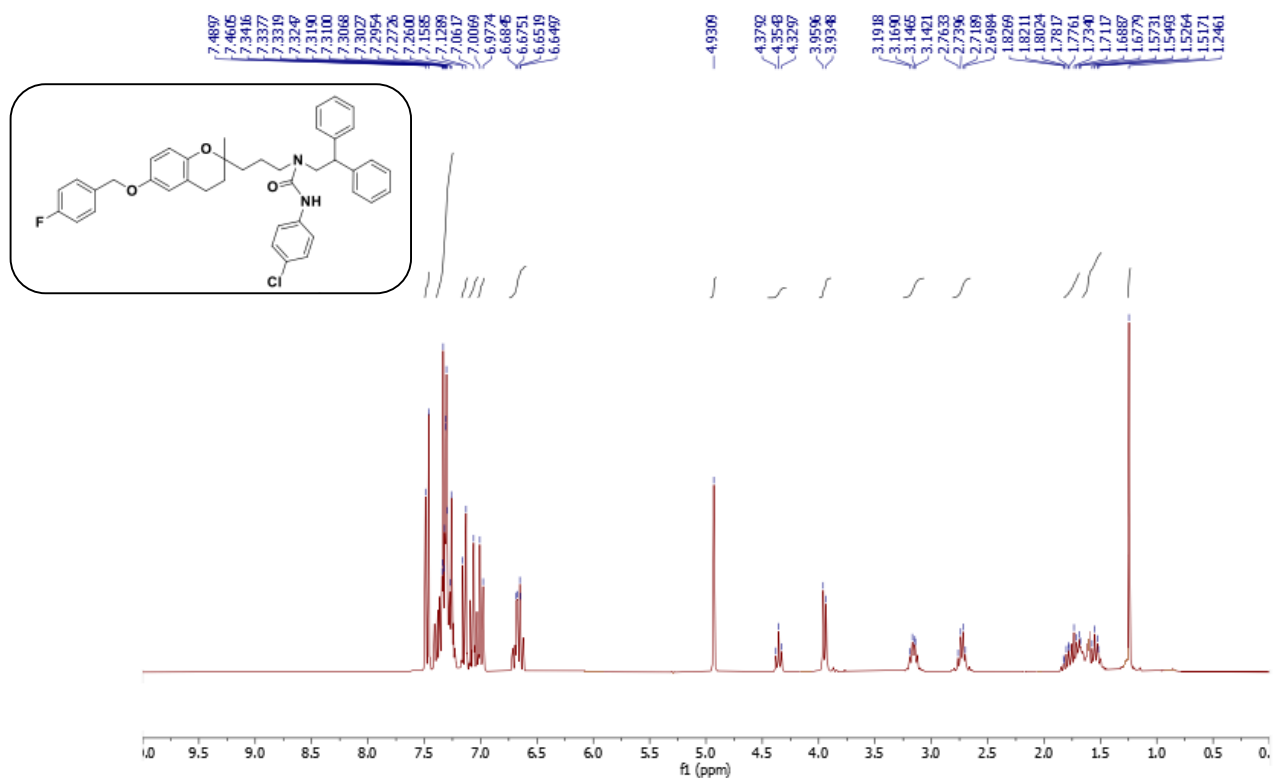

<sup>1</sup>H NMR (300 MHz, CDCl<sub>3</sub>) of 3-(*p*-Chlorophenyl)-*N*-(2,2-diphenylethyl)-*N*-(3-(6-((*p*-fluorobenzyl)oxy)-2-methyl-dihydrobenzopyran-2-yl)propyl)urea (**6d**).

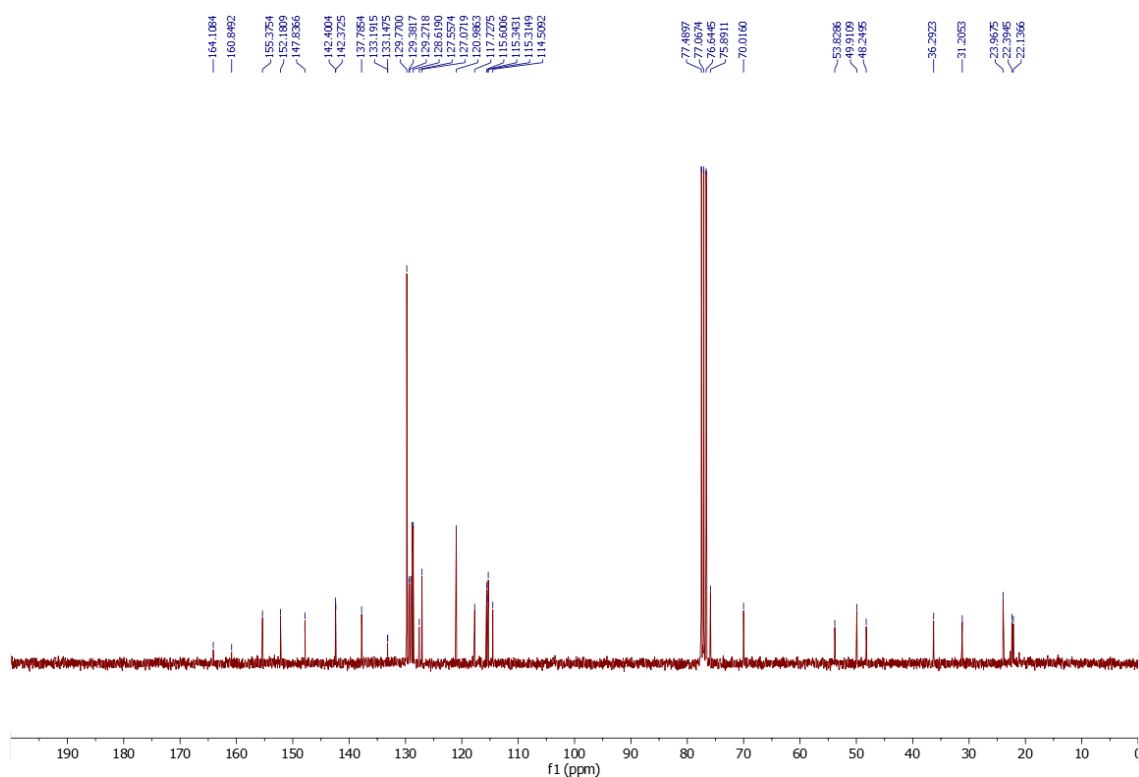

<sup>13</sup>C NMR (75 MHz, CDCl<sub>3</sub>) 3-(*p*-Chlorophenyl)-*N*-(2,2-diphenylethyl)-*N*-(3-(6-((*p*-fluorobenzyl)oxy)-2-methyl-dihydrobenzopyran-2-yl)propyl)urea (**6d**).

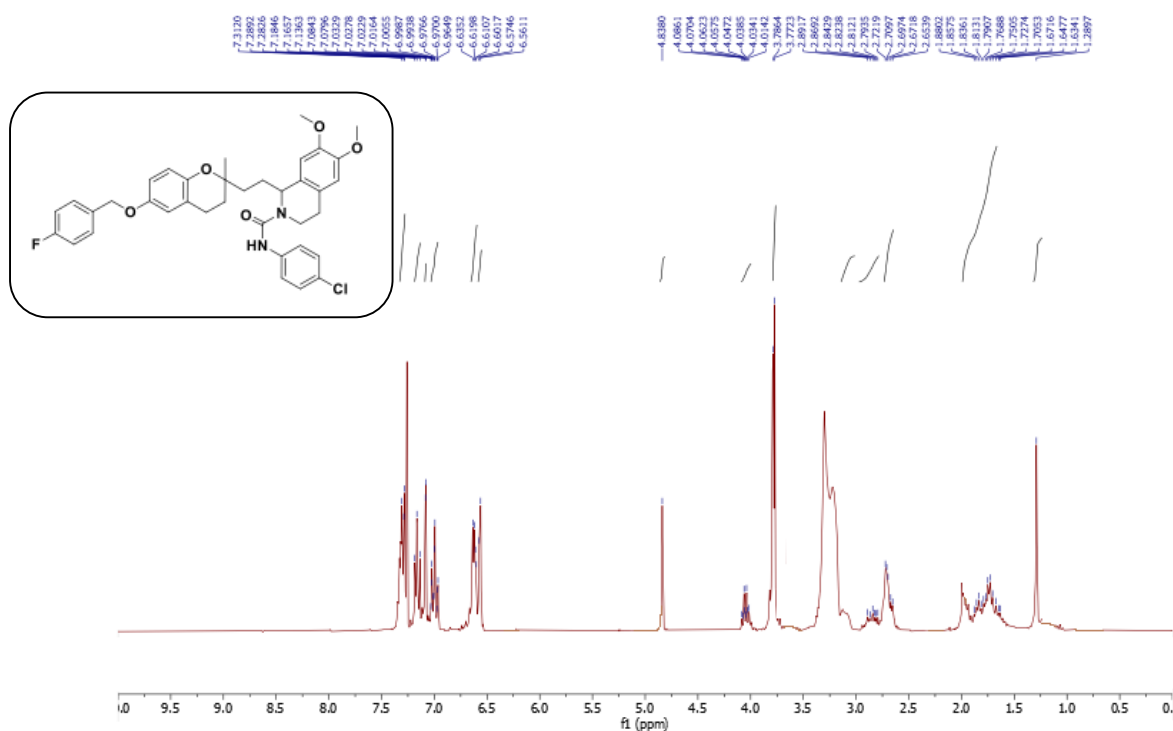

<sup>1</sup>H NMR (300 MHz, CDCl<sub>3</sub> +1 drop CD<sub>3</sub>OD) of *N*-(*p*-Chlorophenyl)-1-(2-(6-(*p*-fluorobenzyl)oxy)-2-methyldihydrobenzopyran-2-yl)ethyl)-6,7-dimethoxy-3,4-dihydroisoquinoline-2(*1H*)-carboxamide (**7d**).

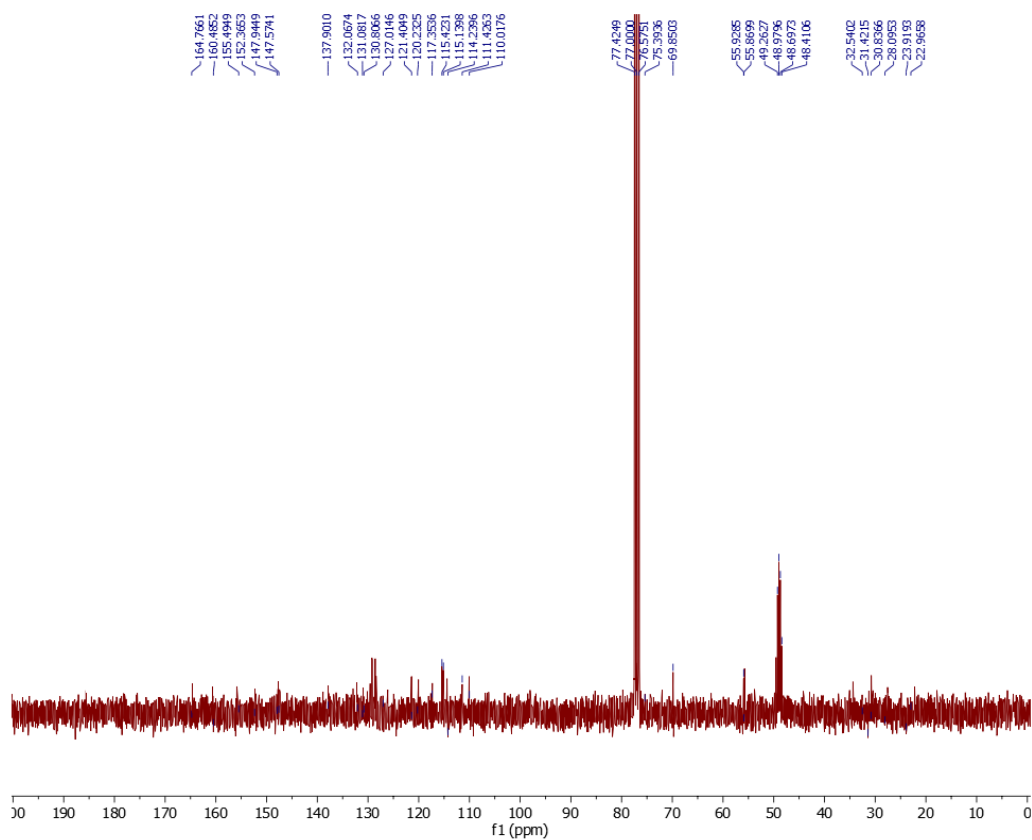

<sup>13</sup>C NMR (75 MHz, CDCl<sub>3</sub> +1 drop CD<sub>3</sub>OD) of *N*-(*p*-Chlorophenyl)-1-(2-(6-(*p*-fluorobenzyl)oxy)-2-methyldihydrobenzopyran-2-yl)ethyl)-6,7-dimethoxy-3,4-dihydroisoquinoline-2(*1H*)-carboxamide (**7d**).
